# Supplementary material for: Clinical and biological significance of de novo CD5+ diffuse large B-cell lymphoma in Western countries
Source: PubMed Central journal article supplement (PMC4467390; doi:10.18632/oncotarget.3479), 2015-03-08
Supplement: oncotarget-06-5615-s001.pdf [file oncotarget-06-5615-s001.pdf]

# Clinical and biological significance of *de novo* CD5<sup>+</sup> diffuse large B-cell lymphoma in western countries

## Supplementary Material

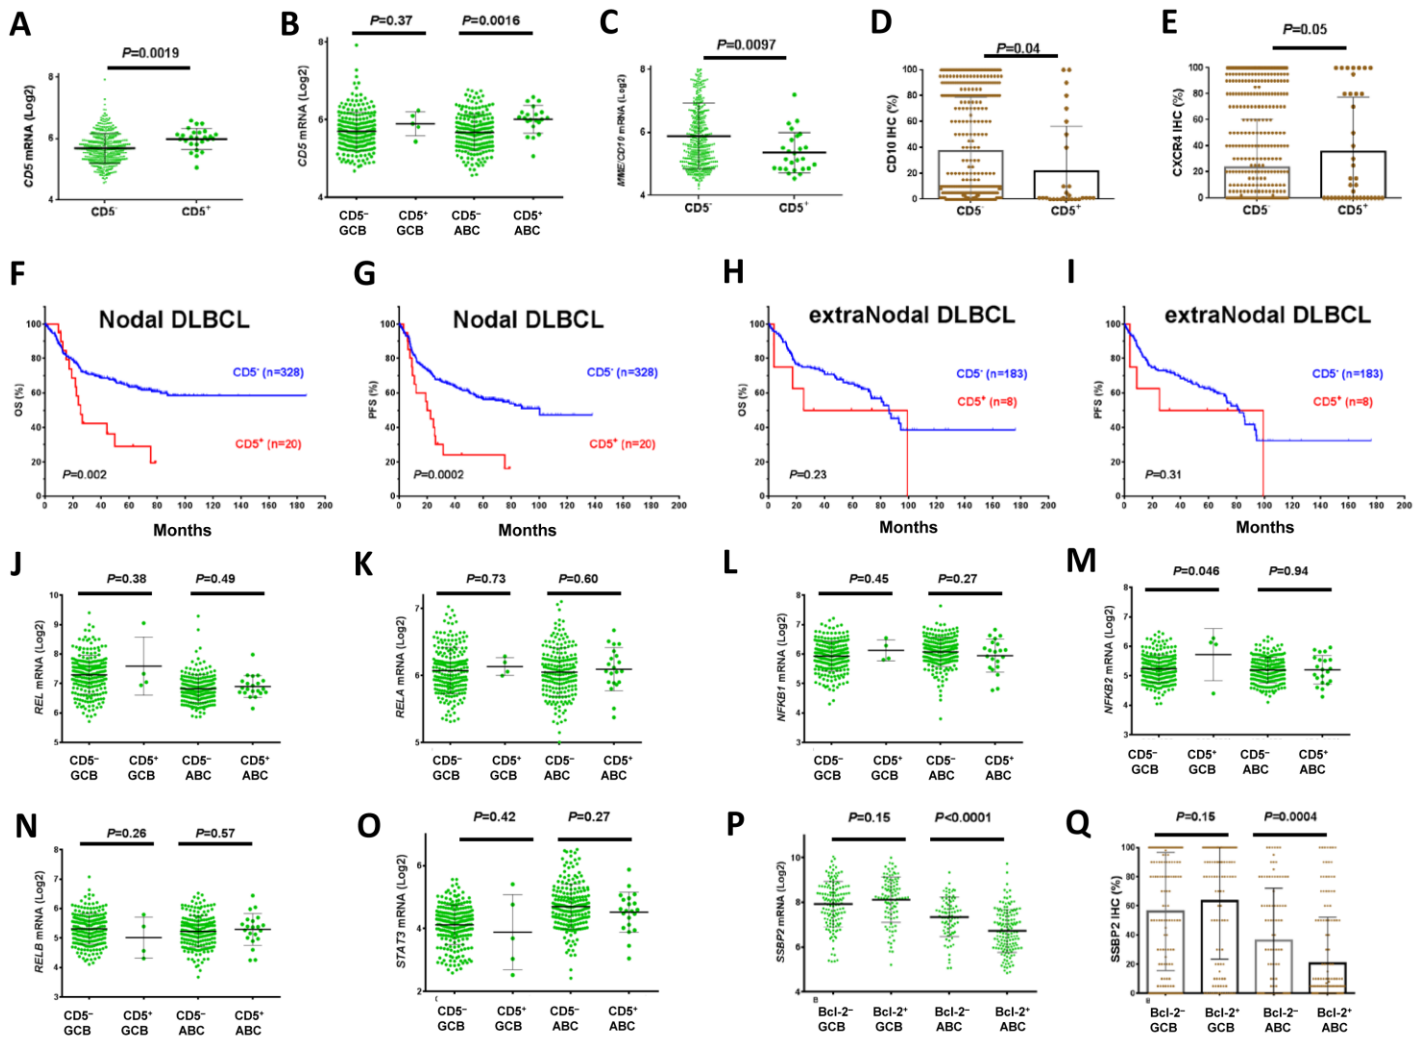

**Supplemental Figure 1:** (A-B) CD5 expression was correlated with upregulated *CD5* mRNA levels, in both GCB and ABC subtypes. (C-D) CD10 expression in CD5<sup>+</sup> and CD5<sup>-</sup> patients. (E) CXCR4 expression in CD5<sup>+</sup> and CD5<sup>-</sup> DLBCL patients. (F-I) The prognostic impact of CD5<sup>+</sup> was significant in nodal DLBCL but not in extranodal DLBCL. (J-O) CD5 expression did not correlate with *REL*, *RELA*, *NFKB1*, *NFKB2*, *RELB*, or *STAT3* mRNA levels. (I-J) Bcl-2 overexpression was correlated with decreased SSBP2 mRNA and protein levels in ABC-DLBCL but not in GCB-DLBCL.

**Prediction legend**

Red circle: Upregulated in CD5+ DLBCL

Orange circle: Predicted activation in CD5+ DLBCL

Green circle: Downregulated in CD5+ DLBCL

Blue circle: Predicted inhibition in CD5+ DLBCL

**Predicted Relationships**

Orange line: Leads to activation

Blue line: Leads to inhibition

Yellow line: Findings inconsistent with state of downstream molecules

**(1) Increased Levels of Red Blood Cells, Hematological System Development and Function, Hematopoiesis**

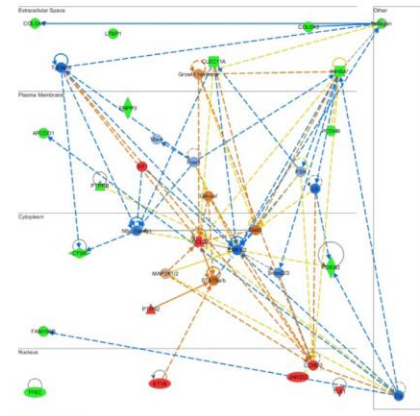

**(2) Humoral Immune Response, Protein Synthesis, Cell Morphology**

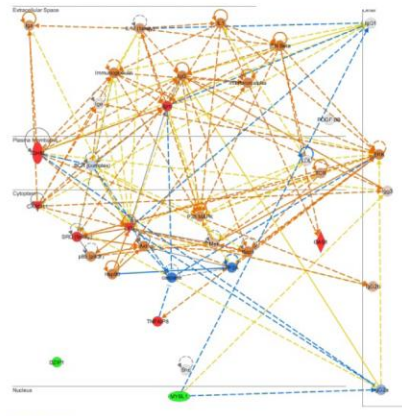

**(3) Nervous System Development and Function, Tissue Morphology, Neurological Disease**

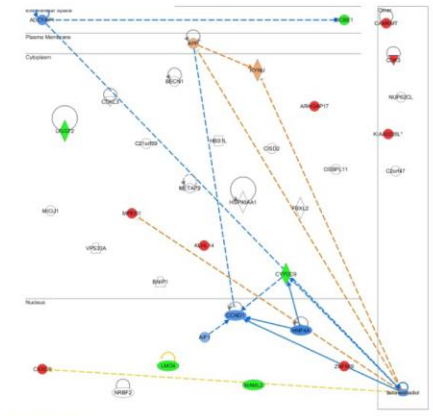

**(4) Gene Expression, Cellular Movement, Nervous System Development and Function**

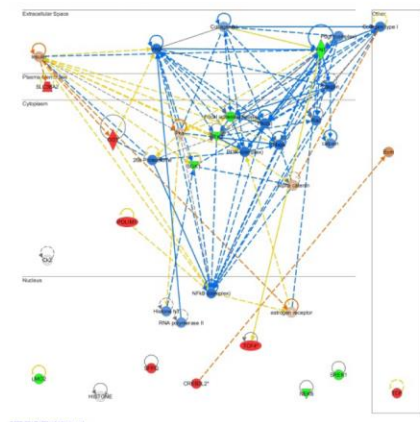

**(5) Cellular Development, Cellular Growth and Proliferation, Hematological System Development and Function**

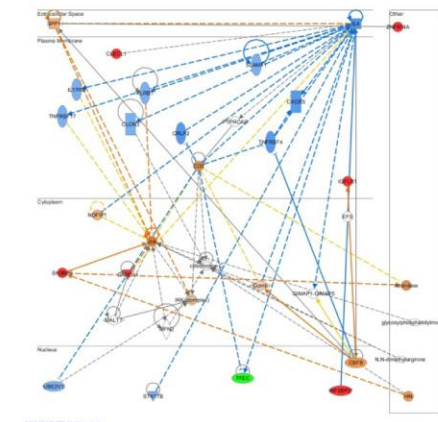

**(6) Cancer, Hematological Disease, Immunological Disease**

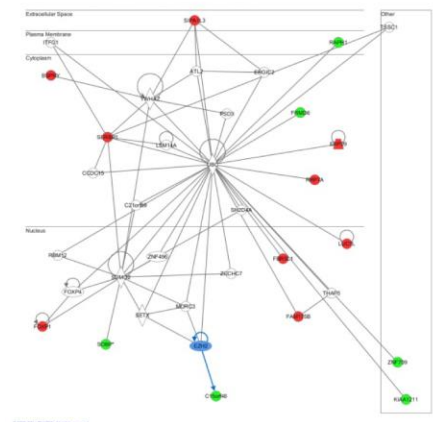

**Supplemental Figure 2:** Associated networks and pathways showing connections for the CD5 signatures in DLBCL generated by the IPA software (<http://www.qiagen.com/ingenuity>).

**Prediction legend**

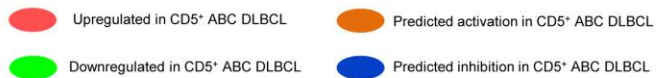

**Predicted Relationships**

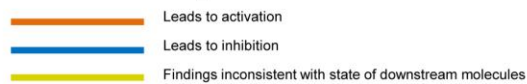

**(1) Developmental Disorder, Hereditary Disorder, Skeletal and Muscular Disorders**

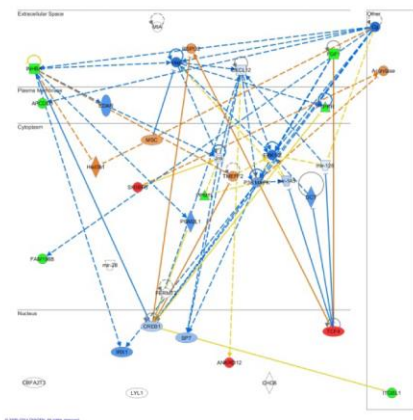

**(2) Humoral Immune Response, Protein Synthesis, Cell Morphology**

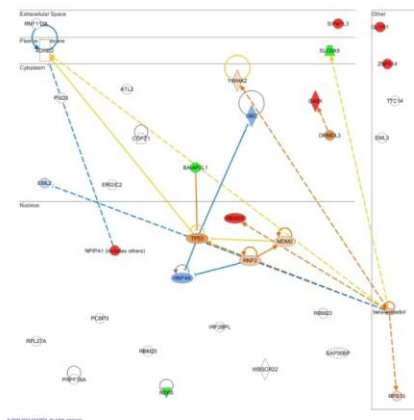

**(3) Cellular Assembly and Organization, Cell Morphology, Cellular Function and Maintenance**

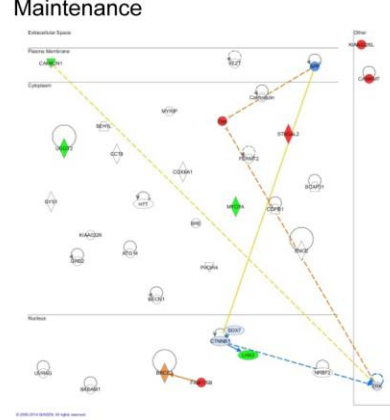

**Supplemental Figure 3:** Associated networks and pathways showing connections for the CD5 signatures in ABC-DLBCL generated by the IPA software (<http://www.qiagen.com/ingenuity>).
